# Supplementary material for: Fungus-larva relation in the formation of Cordyceps sinensis as revealed by stable carbon isotope analysis
Source: PubMed Central journal article supplement (PMC5552863; doi:10.1038/s41598-017-08198-1), 2017-08-10
Supplement: 41598_2017_8198_MOESM1_ESM.pdf [file 41598_2017_8198_MOESM1_ESM.pdf]

## Supplementary Information

**Journal name:** Scientific Reports

**Manuscript title:** Fungus-larva relation in the formation of *Cordyceps sinensis* as revealed by stable carbon isotope analysis

**Authors:** Lian-Xian Guo<sup>1,2</sup>, Yue-Hui Hong<sup>2</sup>, Qian-Zhi Zhou<sup>2</sup>, Qing Zhu<sup>2</sup>, Xiao-Ming Xu<sup>2\*</sup> & Jiang-Hai Wang<sup>2\*</sup>

<sup>1</sup> Dongguan Key Laboratory of Environmental Medicine, School of Public Health, Guangdong Medical University, Dongguan, Guangdong 523808, People's Republic of China

<sup>2</sup> Guangdong Provincial Key Laboratory of Marine Resources and Coastal Engineering/South China Sea Bioresource Exploitation and Utilization Collaborative Innovation Center, School of Marine Sciences, Sun Yat-Sen University, Guangzhou 510006, People's Republic of China

\* Authors to whom correspondence should be addressed. E-mails: wangjhai@mail.sysu.edu.cn (J.-H. Wang); xxm8302@126.com (X.-M. Xu).  
Tel.: +86 20 39332212; Fax: +86 20 85261499.

**Captions:** this file contains a supplementary table (Table S1).

**Table S1.** Stable carbon isotope composition of *C. sinensis* from five representative habitats in the Qinghai-Tibetan Plateau and its adjacent high-altitude areas.

| Sample a  |                              |                              | Sample b  |                              |                              | Sample c  |                              |                              | Sample d  |                              |                              | Sample e  |                              |                              |
|-----------|------------------------------|------------------------------|-----------|------------------------------|------------------------------|-----------|------------------------------|------------------------------|-----------|------------------------------|------------------------------|-----------|------------------------------|------------------------------|
| Subsample | $\delta^{13}\text{C}$<br>(‰) | $\Delta^{13}\text{C}$<br>(‰) | Subsample | $\delta^{13}\text{C}$<br>(‰) | $\Delta^{13}\text{C}$<br>(‰) | Subsample | $\delta^{13}\text{C}$<br>(‰) | $\Delta^{13}\text{C}$<br>(‰) | Subsample | $\delta^{13}\text{C}$<br>(‰) | $\Delta^{13}\text{C}$<br>(‰) | Subsample | $\delta^{13}\text{C}$<br>(‰) | $\Delta^{13}\text{C}$<br>(‰) |
| S17       | -27.87                       | -2.19                        | S21       | -27.91                       | -1.10                        | S17       | -28.60                       | -2.20                        | S16       | -27.99                       | -1.66                        | S15       | -28.35                       | -2.45                        |
| S16       | -27.69                       | -2.01                        | S20       | -27.83                       | -1.02                        | S16       | -28.46                       | -2.06                        | S15       | -27.97                       | -1.64                        | S14       | -28.28                       | -2.38                        |
| S15       | -27.66                       | -1.98                        | S19       | -27.80                       | -0.99                        | S15       | -28.58                       | -2.18                        | S14       | -27.96                       | -1.63                        | S13       | -28.23                       | -2.33                        |
| S14       | -27.44                       | -1.76                        | S18       | -27.76                       | -0.95                        | S14       | -28.42                       | -2.02                        | S13       | -27.95                       | -1.62                        | S12       | -28.05                       | -2.15                        |
| S13       | -27.37                       | -1.69                        | S17       | -27.67                       | -0.86                        | S13       | -28.59                       | -2.19                        | S12       | -27.90                       | -1.57                        | S11       | -27.94                       | -2.04                        |
| S12       | -27.34                       | -1.66                        | S16       | -27.57                       | -0.76                        | S12       | -28.30                       | -1.90                        | S11       | -27.70                       | -1.37                        | S10       | -27.93                       | -2.03                        |
| S11       | -27.27                       | -1.59                        | S15       | -27.56                       | -0.75                        | S11       | -28.47                       | -2.07                        | S10       | -27.68                       | -1.35                        | S9        | -27.81                       | -1.91                        |
| S10       | -27.13                       | -1.45                        | S14       | -27.51                       | -0.70                        | S10       | -28.25                       | -1.85                        | S9        | -27.73                       | -1.40                        | S8        | -27.74                       | -1.84                        |
| S9        | -26.98                       | -1.30                        | S13       | -27.45                       | -0.64                        | S9        | -28.44                       | -2.04                        | S8        | -27.60                       | -1.27                        | S7        | -27.53                       | -1.63                        |
| S8        | -26.93                       | -1.25                        | S12       | -27.49                       | -0.68                        | S8        | -28.19                       | -1.79                        | S7        | -27.64                       | -1.31                        | S6        | -27.35                       | -1.45                        |
| S7        | -27.01                       | -1.33                        | S11       | -27.47                       | -0.66                        | S7        | -28.32                       | -1.92                        | S6        | -27.57                       | -1.24                        | S5        | -27.35                       | -1.45                        |
| S6        | -26.78                       | -1.10                        | S10       | -27.43                       | -0.62                        | S6        | -27.88                       | -1.48                        | S5        | -27.66                       | -1.33                        | S4        | -27.22                       | -1.32                        |
| S5        | -26.75                       | -1.07                        | S9        | -27.37                       | -0.56                        | S5        | -27.98                       | -1.58                        | S4        | -27.63                       | -1.30                        | S3        | -27.24                       | -1.34                        |
| S4        | -26.84                       | -1.16                        | S8        | -27.38                       | -0.57                        | S4        | -27.76                       | -1.36                        | S3        | -27.66                       | -1.33                        | S2        | -27.04                       | -1.14                        |
| S3        | -26.80                       | -1.12                        | S7        | -27.36                       | -0.55                        | S3        | -27.81                       | -1.41                        | S2        | -27.25                       | -0.92                        | S1        | -26.92                       | -1.02                        |
| S2        | -26.65                       | -0.97                        | S6        | -27.21                       | -0.40                        | S2        | -27.53                       | -1.13                        | S1        | -27.23                       | -0.90                        | H1        | -25.90                       | 0.00                         |
| S1        | -26.47                       | -0.79                        | S5        | -27.18                       | -0.37                        | S1        | -27.69                       | -1.29                        | H1        | -26.33                       | 0.00                         | H2        | -25.99                       | -0.09                        |
| H1        | -25.68                       | 0.00                         | S4        | -27.15                       | -0.34                        | H1        | -26.40                       | 0.00                         | H2        | -26.35                       | -0.02                        | T1        | -25.97                       | -0.07                        |
| H2        | -25.72                       | -0.04                        | S3        | -27.13                       | -0.32                        | H2        | -26.51                       | -0.11                        | T1        | -26.33                       | 0.00                         | T2        | -26.24                       | -0.34                        |
| T1        | -25.71                       | -0.03                        | S2        | -27.05                       | -0.24                        | T1        | -26.61                       | -0.21                        | T2        | -26.39                       | -0.06                        | T3        | -26.27                       | -0.37                        |
| T2        | -25.78                       | -0.10                        | S1        | -27.08                       | -0.27                        | T2        | -26.64                       | -0.24                        | T3        | -26.38                       | -0.05                        | A1        | -26.39                       | -0.49                        |

|     |        |       |     |        |       |     |        |       |     |        |       |     |        |       |
|-----|--------|-------|-----|--------|-------|-----|--------|-------|-----|--------|-------|-----|--------|-------|
| T3  | -25.93 | -0.25 | H1  | -26.81 | 0.00  | T3  | -26.79 | -0.39 | A1  | -26.43 | -0.10 | A2  | -26.49 | -0.59 |
| A1  | -26.23 | -0.55 | H2  | -26.83 | -0.02 | A1  | -27.58 | -1.18 | A2  | -26.94 | -0.61 | A3  | -27.67 | -1.77 |
| A2  | -26.63 | -0.95 | T1  | -26.83 | -0.02 | A2  | -27.65 | -1.25 | A3  | -27.36 | -1.03 | A4  | -27.43 | -1.53 |
| A3  | -26.81 | -1.13 | T2  | -26.84 | -0.03 | A3  | -27.48 | -1.08 | A4  | -27.48 | -1.15 | A5  | -27.58 | -1.68 |
| A4  | -27.13 | -1.45 | T3  | -26.94 | -0.13 | A4  | -27.69 | -1.29 | A5  | -27.36 | -1.03 | A6  | -27.63 | -1.73 |
| A5  | -27.18 | -1.50 | A1  | -27.64 | -0.83 | A5  | -27.63 | -1.23 | A6  | -27.44 | -1.11 | A7  | -27.35 | -1.45 |
| A6  | -27.09 | -1.41 | A2  | -28.47 | -1.66 | A6  | -27.41 | -1.01 | A7  | -27.33 | -1.00 | A8  | -27.53 | -1.63 |
| A7  | -27.30 | -1.62 | A3  | -28.35 | -1.54 | A7  | -27.50 | -1.10 | A8  | -27.54 | -1.21 | A9  | -27.43 | -1.53 |
| A8  | -26.99 | -1.31 | A4  | -28.52 | -1.71 | A8  | -27.55 | -1.15 | A9  | -27.37 | -1.04 | A10 | -27.33 | -1.43 |
| A9  | -27.25 | -1.57 | A5  | -28.69 | -1.88 | A9  | -27.45 | -1.05 | A10 | -27.21 | -0.88 | A11 | -27.59 | -1.69 |
| A10 | -26.95 | -1.27 | A6  | -28.43 | -1.62 | A10 | -27.56 | -1.16 | A11 | -27.27 | -0.94 | A12 | -27.49 | -1.59 |
| A11 | -27.22 | -1.54 | A7  | -28.46 | -1.65 | A11 | -27.51 | -1.11 | A12 | -27.44 | -1.11 | A13 | -27.55 | -1.65 |
| A12 | -26.87 | -1.19 | A8  | -28.72 | -1.91 | A12 | -27.64 | -1.24 | A13 | -27.16 | -0.83 | A14 | -27.35 | -1.45 |
| A13 | -26.98 | -1.30 | A9  | -28.67 | -1.86 | A13 | -27.47 | -1.07 | A14 | -27.37 | -1.04 |     |        |       |
| A14 | -26.91 | -1.23 | A10 | -28.53 | -1.72 |     |        |       | A15 | -27.21 | -0.88 |     |        |       |
| A15 | -26.79 | -1.11 | A11 | -28.75 | -1.94 |     |        |       | A16 | -27.24 | -0.91 |     |        |       |
| A16 | -26.84 | -1.16 | A12 | -28.75 | -1.94 |     |        |       |     |        |       |     |        |       |
|     |        |       | A13 | -28.64 | -1.83 |     |        |       |     |        |       |     |        |       |
|     |        |       | A14 | -28.58 | -1.77 |     |        |       |     |        |       |     |        |       |
|     |        |       | A15 | -28.53 | -1.72 |     |        |       |     |        |       |     |        |       |

Each sample of *C. sinensis* was sectioned into approximately 40 subsamples from the stroma top to the sclerotium end. S1 to Si, H1 to H2, T1 to T3, and A1 to Ai are the subsamples from the stroma, head, thorax, and abdomen according to their positions, respectively. All the  $\delta^{13}\text{C}$  values are the means of thrice determinations, and have the relative standard deviations less than 0.50%; and the  $\Delta^{13}\text{C}$  values represent the differences of the  $\delta^{13}\text{C}$  values between the head (H1) and other parts in each sample of *C. sinensis*.
